# Supplementary material for: Targeting the IGF1R Pathway in Breast Cancer Using Antisense lncRNA-Mediated Promoter cis Competition
Source: PubMed Central journal article supplement — Mol Ther Nucleic Acids. 2018 May 3;12:105–17. doi: 10.1016/j.omtn.2018.04.013 (PMC6023958; doi:10.1016/j.omtn.2018.04.013), 2018-05-03
Supplement: mmc1.pdf [file mmc1.pdf]

## Supplemental Information

### Targeting the *IGF1R* Pathway in Breast Cancer

### Using Antisense lncRNA-Mediated Promoter

### *cis* Competition

Lingling Pian, Xue Wen, Lihua Kang, Zhaozhi Li, Yuanyuan Nie, Zhonghua Du, Dehai Yu, Lei Zhou, Lin Jia, Naifei Chen, Dan Li, Songling Zhang, Wei Li, Andrew R. Hoffman, Jingnan Sun, Jiuwei Cui, and Ji-Fan Hu

**Table S1. Oligonucleotide primers used for PCR**

| ID               | Oligo Name | Oligo sequence                                                  | Product size |
|------------------|------------|-----------------------------------------------------------------|--------------|
| qPCR expression  |            |                                                                 |              |
| IGFIR            | JH217      | GAAGTCTGGCTCCGGAGGAGGGTC                                        | 180 bp       |
|                  | JH218      | ATGTGGAGGTAGCCCTCGATCAC                                         |              |
| IRAIN            | JH248      | CGACACATGGTCCAATCACTGTT                                         | 138 bp       |
|                  | JH249      | AGACTCCCCTAGGACTGCCATCT                                         |              |
| NM23             | WX011      | TTGAGCGTACCTCCATTGCGATC                                         | 370 bp       |
|                  | WX012      | TTTGCACTCTCCACAGAATCACT                                         |              |
| B-ACTIN          | J880       | CAGGTCATCACCATTTGGCAATGAGC                                      | 135 bp       |
|                  | J881       | CGGATGTCCACGTCACACTTCATGA                                       |              |
| Targeting        |            |                                                                 |              |
|                  | SJ131      | CTGGGGTAGAAAGATGACTGAA                                          |              |
|                  | JH583      | ACGCATTTATTTATTTTGCAACAGC                                       |              |
| DNA methylation  |            |                                                                 |              |
|                  | SJ996      | TYGTAYGTTTTGGGGAATYGGGTTT                                       | 204 bp       |
|                  | SJ997      | ACTAATAAAACAAAAACCCCAACCTC                                      |              |
|                  | SJ998      | GTGTTTTGGATTTGGGAAGGAGTT                                        | 279 bp       |
|                  | SJ999      | AAACAAAACCCAAATCTACCTAAAC                                       |              |
| Targeting vector |            |                                                                 |              |
|                  | JH1094     | CAGTGCAGGGGAAAGAATAG                                            | 422 bp       |
|                  | JH485      | TCAGTTTTTAGCCGGGAAGGT                                           |              |
|                  | SJ130      | ACGCGTATATCTGGCCCGTACA                                          | 921 bp       |
|                  | SJ131      | CTGGGGTAGAAAGATGACTGAA                                          |              |
| ARM1             | SJ016      | TCAAAATTTTATCGATATTATCTGGCTATCACTC<br>AGAACCT                   | 777 bp       |
|                  | SJ017      | GCGTATATCTGGCCCGTACATCTTCGAAGATAA<br>GTACGGTTTAGAAGACACG        |              |
| PCMV             | SJ018      | GATGTACGGGCCAGATATACGCG                                         | 659 bp       |
|                  | SJ019      | ACCGTGGGCTTGTACTIONCGGTCATTGTACAATTT<br>CGATAAGCCAGTAAGCAGTG    |              |
| PURO             | SJ020      | ATGACCGAGTACAAGCCCACGGT                                         | 612 bp       |
|                  | SJ021      | GCCCTGGGGACGTCGTCGCGGGTGGCGAGGC<br>GCACCGTGGGCTTGTACTIONCGGTCAT |              |
| ARM2             | JH986      | GCAGAAGAGAGGGCGACACGACGCCGACCAC<br>AACAAAACCAAGGC               | 2 kb         |
|                  | SJ023      | TTAAATCGACGCTAGCCCTCGGCTGTGACCTT<br>CAGCGAGC                    |              |
| PH1-1            | SU47       | CAGCCGAGGGCTAGCTTTAAGACCAATGACTT<br>ACAAGGC                     | 361 bp       |
|                  | SJ138      | CTAAACGTCTGGTAAGAAATGGGATCCAAGTG<br>GTCTCATACAG                 |              |
| gRNA1            | SJ139      | CCCATTCTTACCAGACGTTTAGTTTTAGAGCT<br>AGAAATAGCAAGTT              | 140 bp       |
|                  | SJ140      | AGGCCCTCTTCCTGCCCGACCTTGTCGACAAA<br>AAAAGCACCGACTCGGTGCCA       |              |

|             |        |                                                             |        |
|-------------|--------|-------------------------------------------------------------|--------|
| PU6         | SJ141  | GTGGCACCGAGTCGGTGCTTTTTTTGTGCGACA<br>AGGTCGGGCAGGAAGAGGGCCT | 316 bp |
|             | SJ142  | CAGTGGGACGCGGACTGGGGCGGTGTTTCGT<br>CCTTTCCACAAGA            |        |
| gRNA2       | SJ143  | CCGCCCCAGTCCGCGTCCCAGTGTTTTAGAGC<br>TAGAAATAGCAAGTT         | 119 bp |
|             | SJ144  | GCAAAAAGCAGAATCGAAGAATTCAAAAAAA<br>GCACCGACTCGGTGCCAC       |        |
|             | SU48   | CCCCTACCCATTTAAATGAAGCAAAAAGCAGA<br>ATCGAAGAATTC            |        |
| PH1-2       | SU47   | CAGCCGAGGGCTAGCTTTAAGACCAATGACTT<br>ACAAGGC                 | 361 bp |
|             | SJ145  | CTTACTAAGTCGTTTAGGTGGGGATCCAAGTG<br>GTCTCATACAG             |        |
| PU6-1       | SJ141  | GTGGCACCGAGTCGGTGCTTTTTTTGTGCGACA<br>AGGTCGGGCAGGAAGAGGGCCT | 316 bp |
|             | SJ147  | CGACCTTCCACAGATCTGGGCGGTGTTTCGTC<br>CTTTCCACAAGA            |        |
| gRNA3       | SJ146  | CCCCACCTAAACGACTTAGTAAGTTTTAGAGC<br>TAGAAATAGCAAGTT         | 145 bp |
|             | SJ140  | AGGCCCTCTTCCTGCCCGACCTTGTCGACAAA<br>AAAAGCACCGACTCGGTGCCA   |        |
| PU6-2       | SJ141  | GTGGCACCGAGTCGGTGCTTTTTTTGTGCGACA<br>AGGTCGGGCAGGAAGAGGGCCT | 316 bp |
|             | SJ147  | CGACCTTCCACAGATCTGGGCGGTGTTTCGTC<br>CTTTCCACAAGA            |        |
| gRNA4       | SJ148  | CCGCCCAGATCTGTGGAAGGTCGTTTTAGAGC<br>TAGAAATAGCAAGTT         | 119 bp |
|             | SJ144  | GCAAAAAGCAGAATCGAAGAATTCAAAAAAA<br>GCACCGACTCGGTGCCAC       |        |
| RAT primers |        |                                                             |        |
|             | JH513  | CCTTTGTCCATGTGGTCAAGTT                                      |        |
|             | JH400  | CATCAGGTCCCTTCTACCATCC                                      |        |
|             | JH745  | ACGCATTTATTTATTTTGCAACAGCTGC                                |        |
|             | JH780  | GTTTCCGCAGTAGCCGCTGAT                                       |        |
| siRNAs      |        |                                                             |        |
|             | IRAIN1 | CCUCAUGCAGAGAACUUAATT<br>UUAAGUUCUCUGCAUGAGGTT              |        |
|             | IRAIN2 | CCAGUCACUUACGUAGCAATT<br>UUGCUACGUAAGUGACUGGTT              |        |
|             | IRAIN3 | CCGCAUGCACGCAUUUAUUTT<br>AAUAAAUGCGUGCAUGCGGTT              |        |
|             | siCT   | UUCUCCGAACGUGUCACGUTT<br>ACGUGACACGUUCGGAGAATT              |        |

## SUPPLEMENTARY FIGURE LEGENDS

### Figure S1. ALIC targeting of the *IGF1R* and *IRAIN* locus.

- A. CRISPR Cas9 *IRAIN*-gRNA targeting vector. Cas9: CRISPR Cas9; gRNA: Cas9 guiding RNAs that target the *IRAIN* promoter (sequences under the diagram); pEF1: the human EF-1a promoter; pH1: human H1 promoter; pU6: U6 promoter; T5: the TTTTTT termination signal of RNA polymerase III.
- B. Location of the four *IRAIN* Cas9 gRNAs. The *IRAIN* arm fragments was presented in green capitals. The *IRAIN* gRNA sequences were highlighted in yellow and PAM (NGG) in red in the *IRAIN* promoter region.
- C. The *IRAIN* donor vector. pCMV: CMV promoter to transcribe the puromycin selection marker gene; pPGK: PGK promoter to transcribe the TK negative selection marker gene; TK+: the herpesvirus thymidine kinase gene for negative selection of the targeting clone cells; loxP: the locus of X-over P1 recombination site recognized by Cre to remove the Puro+ gene; Arm1, Arm2: the *IRAIN* arm sequences used for recombination.

### Figure S2. Mapping of the *IGF1R* targeting locus by DNA sequencing.

- A. The *IGF1R-IRAIN* targeting locus. The donor vector contains the *IRAIN* Arm2-Puro-pCMV-Arm1 insert. The Arm2-Arm1 fragments provide the donor sequences for homologous recombination after the Cas9-induced DNA break. Puro+: Puromycin selection marker used for selection. pCMV: CMV promoter. After homologous recombination and Cre recombinase treatment, the CMV promoter is inserted in front of the *IRAIN* lncRNA. Primers (SJ131 and JH583)

were used to amplify the whole targeting locus containing the 5' flanking genomic DNA-Arm2-pCMV-Arm1-3' flanking genomic DNA. The PCR DNA was cloned into a pJet vector for sequencing.

- B. Sequencing of the recombination sites in the *IGF1R* locus. The DNA fragment covering the whole targeting locus was sequenced. The joint sites of recombination were marked by red arrows.

**Figure S3. IRAIN siRNA knockdown in ALIC targeted cells.**

The pCMV-IRAIN knockin cells (ALIC) were transfected with IRAIN siRNAs (siIRAIN) or control siRNA (siCT). Cells were collected for gene analysis of *IRAIN* by quantitative PCR. Error bars represent the standard error of the average of three independent PCR reactions. a,b:  $p < 0.05$  as compared with the vector control (CTL); c:  $p < 0.05$  as compared with the siCT control.

**Figure S4. The RAT-Seq assay.**

Schematic diagram of the nuclear *in situ* lncRNA reverse transcription-associated trap (RAT) assay. After crosslinking to fix the lncRNA-chromatin structure, *IRAIN* lncRNA was *in situ* reverse transcribed into lncDNA in the nucleus with biotin-dCTP. The *IRAIN*-binding chromatin DNAs were sonicated into fragments and purified with streptavidin beads. After reversal of crosslink, lncDNA was extracted for DNA library construction and Illumina sequencing.

**Figure S5. The *IRAIN* lncRNA binding targets.**

Gene ontology analysis of *IRAIN* target genes from the nuclear *in situ* lncRNA reverse transcription-associated trap (RAT) assay.

**Figure S6. Expression of target genes and cell growth in *IRAIN*-overexpressing cells.**

- A. MDA-MB-231 tumor cells were infected with lentiviruses carrying the 5K *IRAIN* cDNA (IRAIN5K) or the copGFP vector control (Vector). After viral infection, cells were selected by puromycin and were collected for gene analysis of *IRAIN* target genes using quantitative PCR. The data shown are mean  $\pm$  SD of three independent PCR reactions. \*  $p < 0.05$ , \*\*  $p < 0.01$  as compared with the vector control.
- B. Cell proliferation. The *IRAIN*-overexpressing stable cells were collected for analysis of cell proliferation using the MTT assay. The cells that stably expressed the copGFP vector were used as the vector control (Vector). Cell growth was measured as the relative absorbance by setting 0 hour as 1. All experiments were performed in triplicate.
- C. Cell cycle. The *IRAIN*-overexpressing stable cells and the vector control cells were collected at 24 hrs, 48 hrs, and 7 hrs for FACS analysis. Cell cycle phase distribution was determined by Cell Quest Pro software and was calculated as the relative value for each phase. No significance of phase distribution was detected between the *IRAIN*-overexpressing and vector control cells.

D. Cell migration. Cell migration was measured by scratch assay at 19 hrs following cell plating.

A. *IGF1R* ALIC gRNA vector

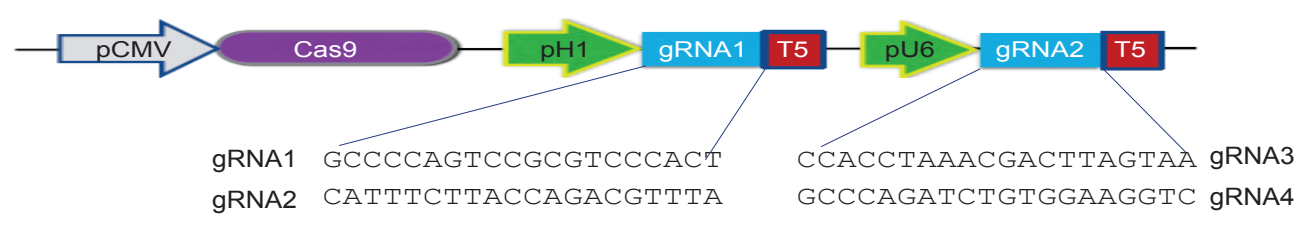

B. Location of Cas9-gRNAs

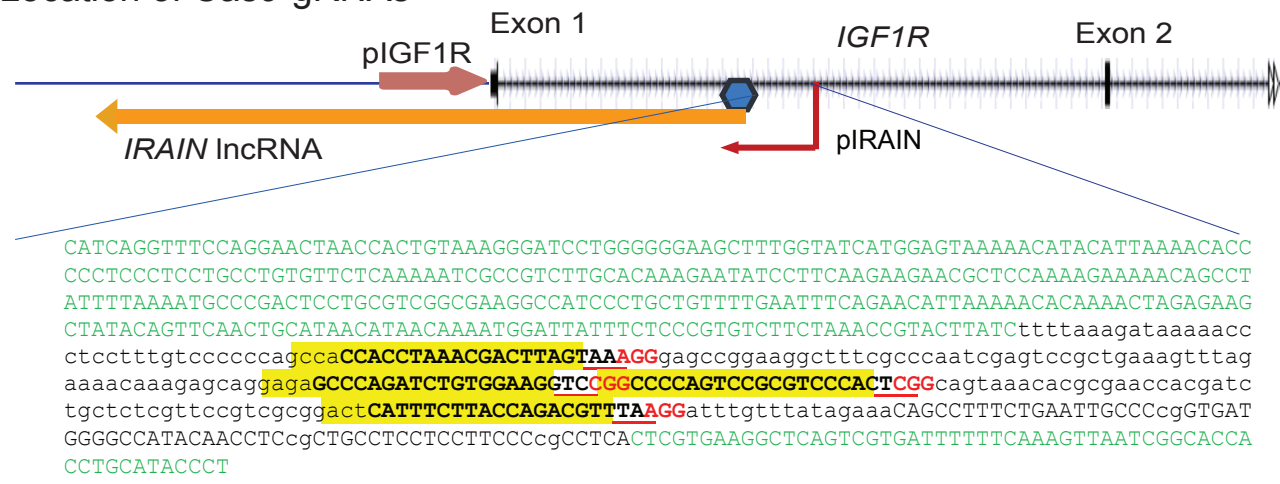

C. Donor vector

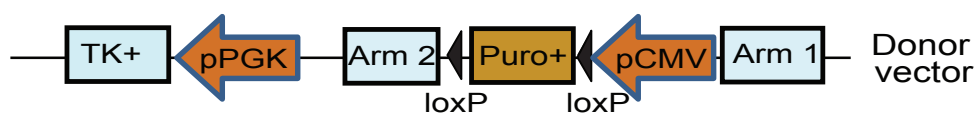

Figure S1. *IGF1R* ALIC Cas9-gRNA targeting and donor vectors

## A. The *IGF1R-IRAIN* locus

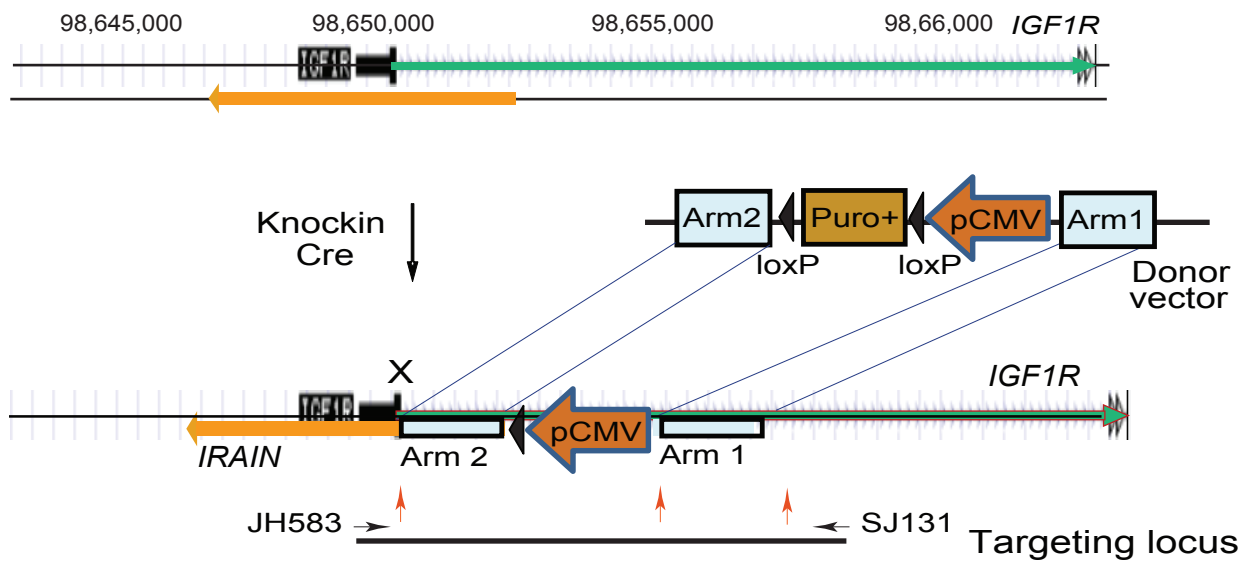

## B. Sequencing of the *IGF1R* targeting locus

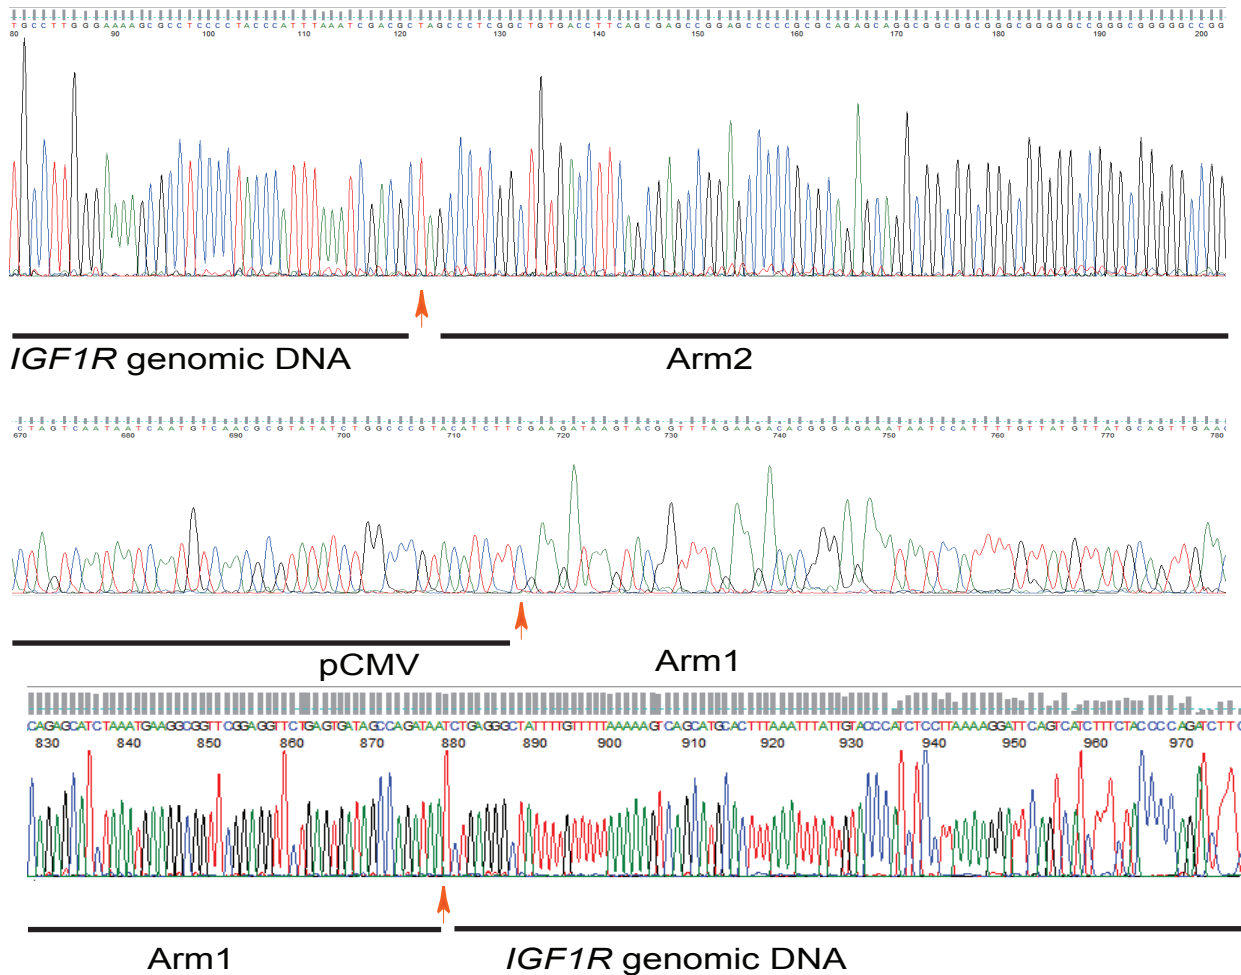

Figure S2. Sequencing of the targeting site of the *IGF1R* locus

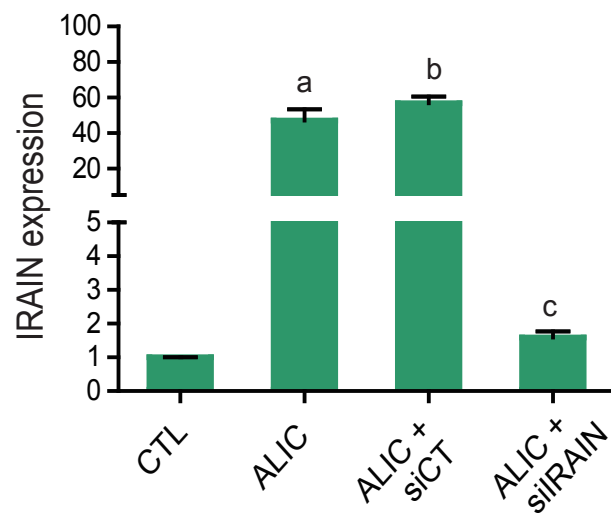

Figure S3. Knockdown of IRAIN lncRNA by siRNAs in ALIC targeted cells

## A. Nuclear *in situ* RAT assay

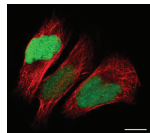

Cell fixation

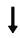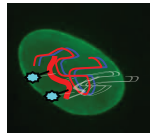

*IRA1N* lncRNA nuclear *in situ* RT  
(biotin-*IRA1N* lncDNA)

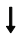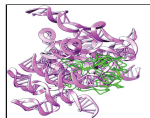

Chromatin sonication

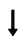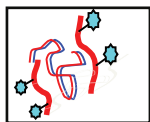

Streptavidin bead purification of *IRA1N* lncDNA  
library construction

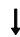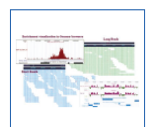

DNA sequencing  
*IRA1N* target analysis

Figure S4. *IRA1N* lncRNA in situ RAT assay

A. *IRAIN* RAT-Seq targets

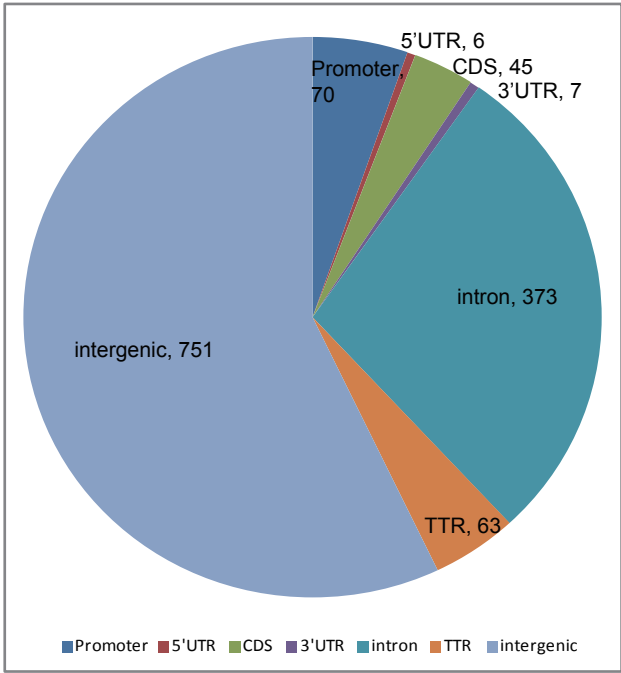

Figure S5. *IRAIN* RAT-Seq targets

A. *IRAIN* target gene expression

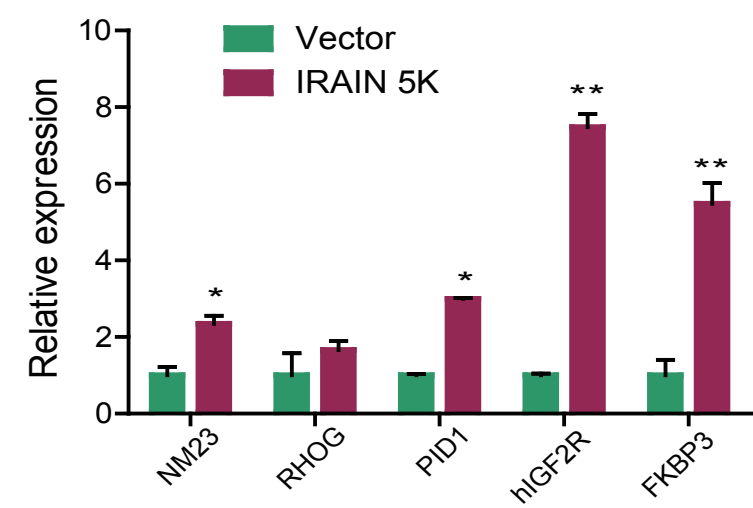

B. Cell proliferation

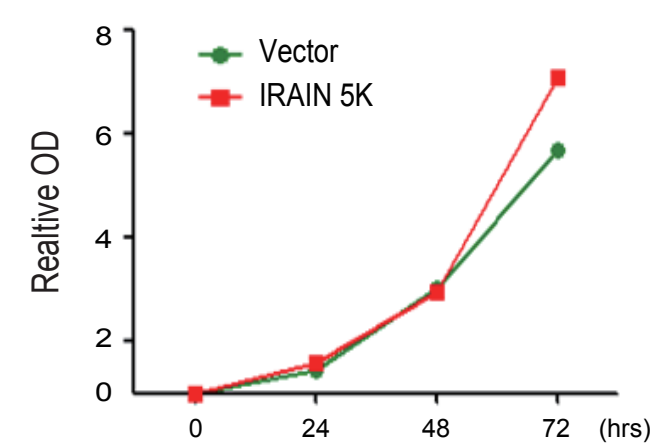

C. Cell cycle

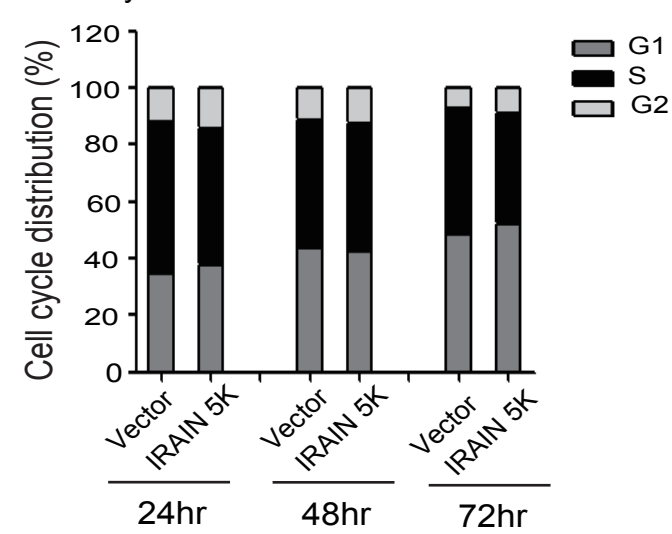

D. Cell migration

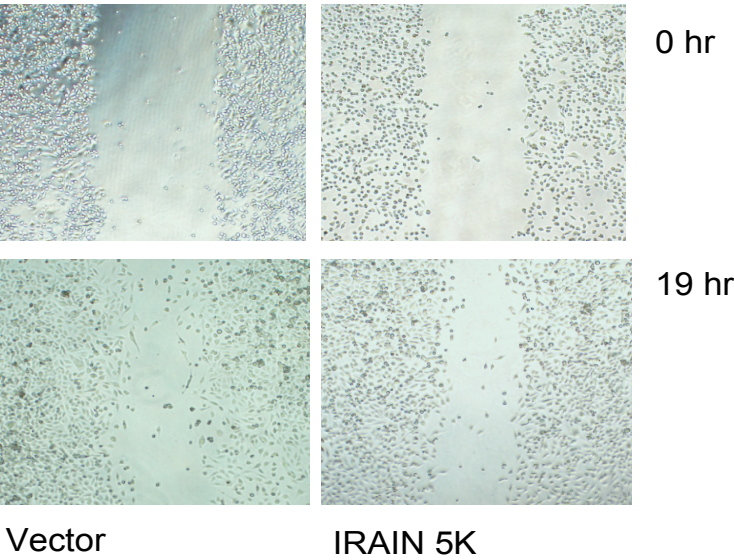

Figure S6. Target genes and cell growth in the *IRAIN* trans-overexpressing cells
